# Supplementary material for: Attitudes towards Sardinian and Italian finally compared via the Matched-Guise Technique
Source: publisher site journal article supplement (doi:10.1515/ijsl-2023-0084), 2024-07-01
Supplement: Supplementary file 1 [file j_ijsl-2023-0084_suppl_002.docx]

**Separate file for figures – Figure 8 (Supplementary Material)**


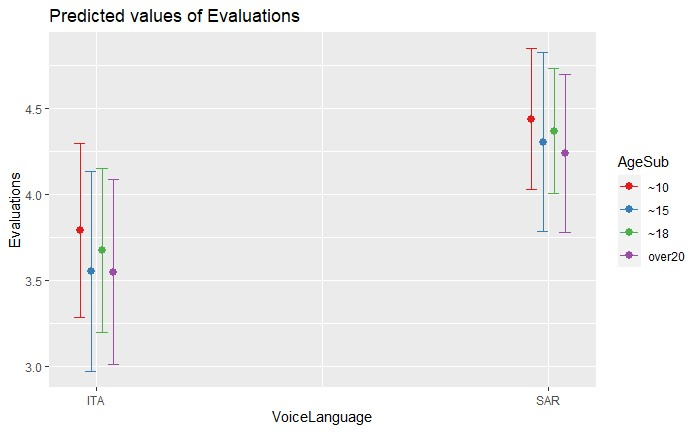


**Figure 8.** Effect of the interaction between subjects’ age (*AgeSub*) and language of the voices (*VoiceLanguage*).
